# Supplementary material for: Prevalence, antibiotic resistance, and virulence gene profiles of uropathogenic Escherichia coli (UPEC) isolated from raw milk: implications for public health
Source: Research Square preprint supplement (doi:10.21203/rs.3.rs-8060277/v1), 2025-12-18
Supplement: Supplementary file 1 [file 058ecb2971212e8e67b2a848.docx]

**Prevalence, antibiotic resistance, and virulence gene profiles of uropathogenic *Escherichia coli* (UPEC) isolated from raw milk: implications for public health**

**Aynur Akan1, Seval Cing Yildirim2* Cumhur Avsar3, Zeynep Yegin4**

1Department of Biology, Faculty of Arts & Sciences, Inonu University, Malatya, Turkey, <https://orcid.org/0009-0000-6138-9257>

2Department of Biology, Faculty of Arts & Sciences, Inonu University, Malatya, Turkey, <https://orcid.org/0000-0001-7163-9512>

3Department of Biology, Faculty of Arts & Sciences, Sinop University, Sinop, Turkey,

<https://orcid.org/0000-0002-4095-0022>

4Medical Laboratory Techniques Program, Vocational School of Health Services, Sinop University, Sinop, Turkey, <https://orcid.org/0000-0003-4637-0253>

*Corresponding author: Seval Cing Yildirim

Department of Biology, Faculty of Arts & Sciences, Inonu University, Malatya, Turkey

1. mail: [seval.cing@inonu.edu.tr;](mailto:seval.cing@inonu.edu.tr;) [scingy@gmail.com](mailto:scingy@gmail.com)


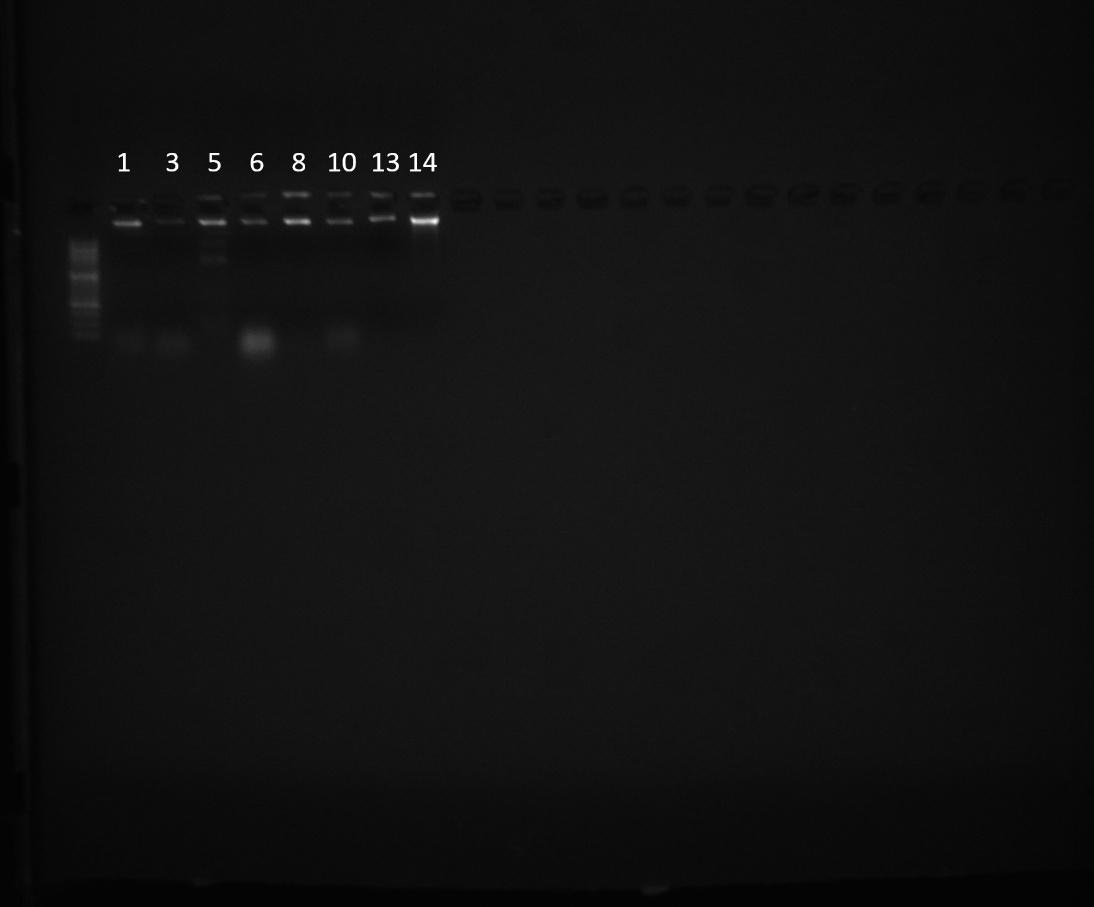


**Supplementary Figure S1.** Uncropped gel image showing genomic DNA integrity analysis of *E. coli* isolates.

*(Gel image prepared by Cumhur Avşar, Zeynep Yegin, and Aynur Akan)*

**
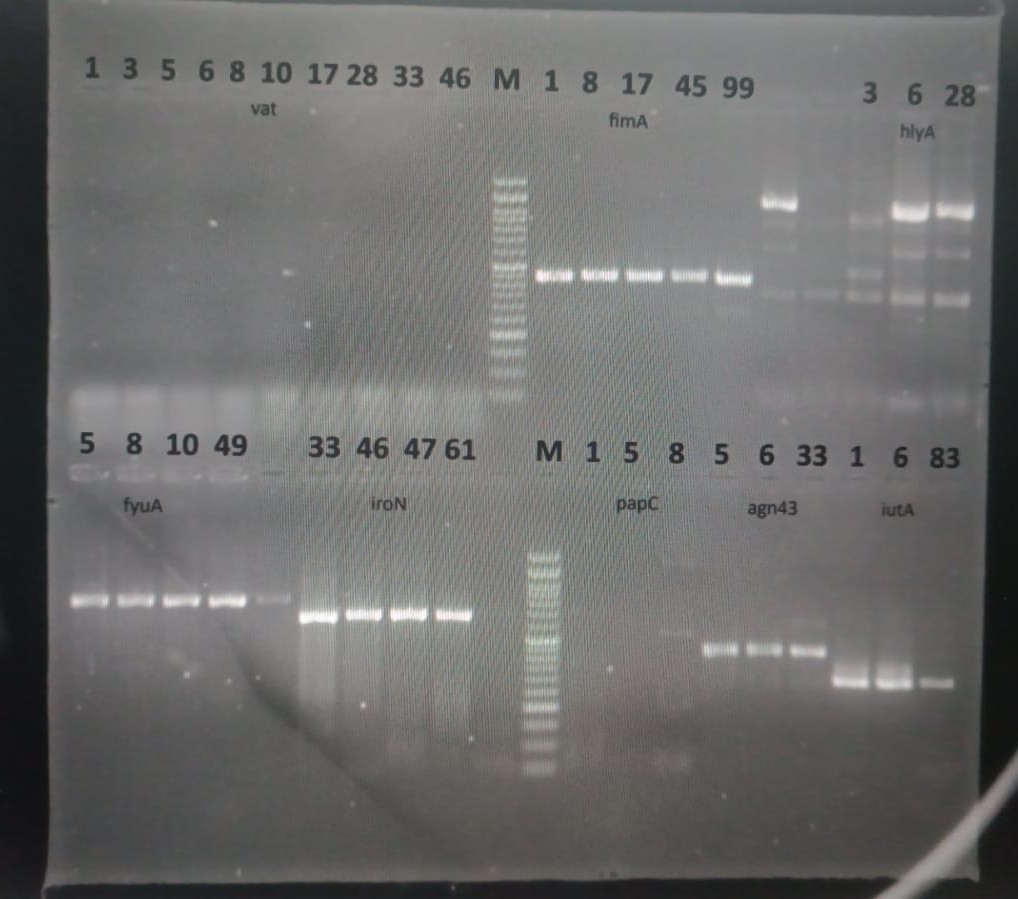
**

**Supplementary Figure S2.** PCR amplification patterns of virulence genes detected in potential UPEC strains.

*(Gel image prepared by Cumhur Avşar, Zeynep Yegin, and Aynur Akan)*


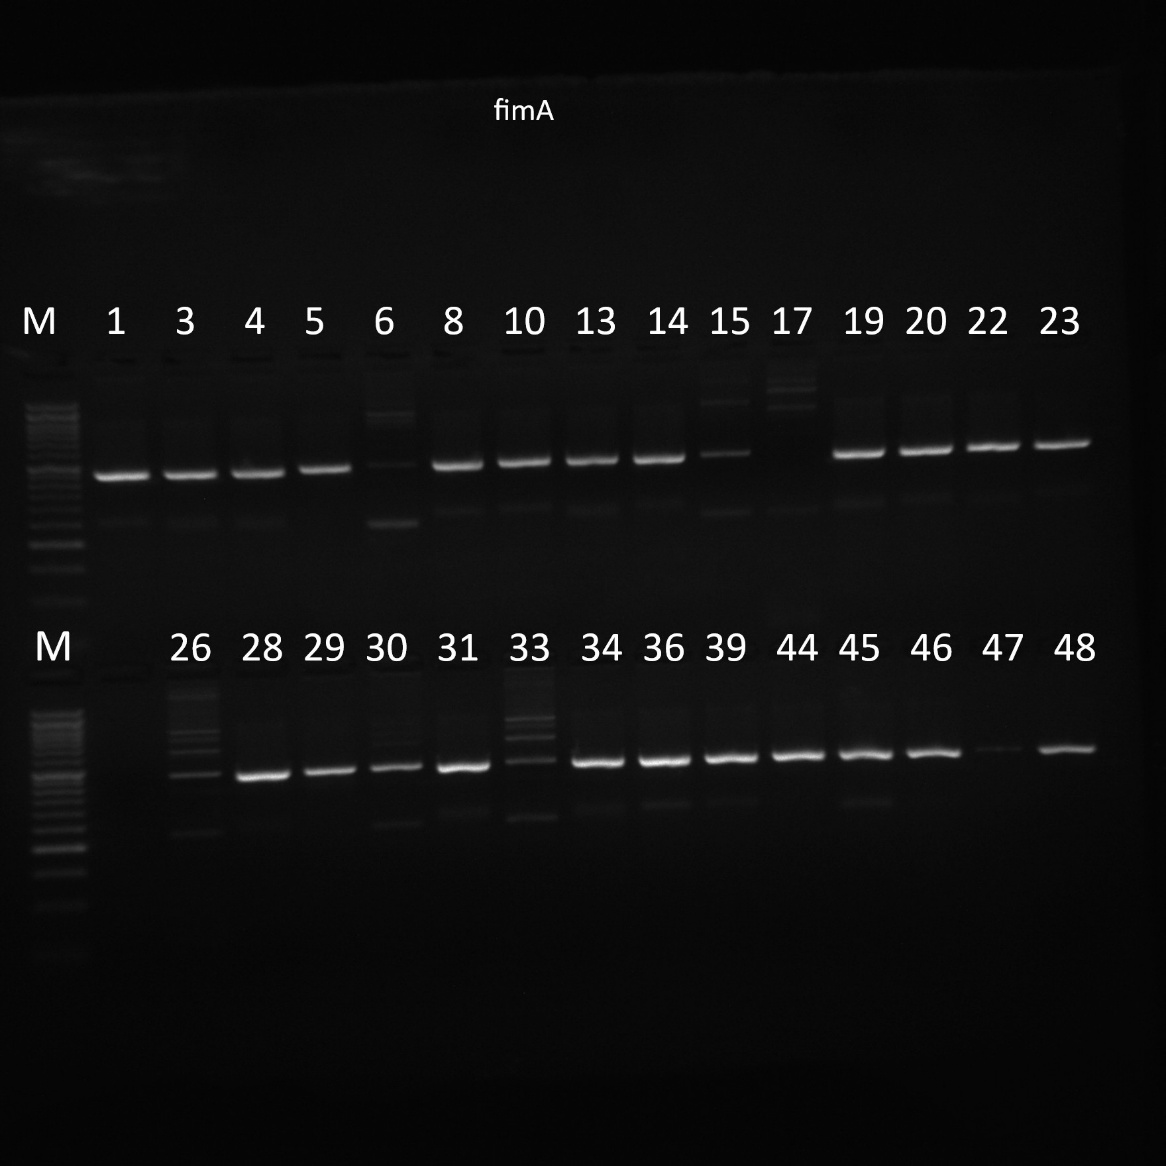


**Supplementary Figure S3.** PCR amplification pattern of the *fimA* virulence gene detected in potential UPEC strains. *(Gel image prepared by Cumhur Avşar, Zeynep Yegin, and Aynur Akan)*
